# Supplementary material for: Silicon nanowires with a carbon nanofiber branch as lithium-ion anode material
Source: Royal Society of Chemistry journal article supplement (doi:10.1039/c1jm12511g), 2011-01-01
Supplement: c1jm12511g.pdf [file c1jm12511g.pdf]

## **Electronic Supplementary Information**

### **Silicon Nanowires with a Carbon Nanofiber Branch**

#### **as Lithium-Ion Anode Material**

Taeseup Song, Dong Hyun Lee, Moon Seok Kwon, Jae Man Choi, Hyungkyu Han, Seok Gwang Doo, Hyuk Chang, Won Il Park, Wolfgang Sigmund, Hansu Kim\* and Ungyu Paik\*

#### **Experimental**

Fig. S1 SEM and TEM images of Si nanowire

Fig. S2 Raman spectrum of Si nanowire

Fig. S3 Electrochemical performances of Si-CNF structures

Fig. S4 Voltage profiles of CNFs

### **Synthesis of Si nanowires with a carbon nanofiber branch and characterization**

Si nanowires were grown on SUS 304 stainless steel (Nilaco) substrates via vapor-liquid-solid (VLS) reactions. Negatively charged, 30 nm diameter, colloidal Au catalysts were decorated on the substrate and functionalized with positively charged poly-L-lysine. The Au colloid decorated substrate was placed in the center of a quartz reactor of a CVD tube furnace. H<sub>2</sub> and SiH<sub>4</sub> (10 vol % diluted in H<sub>2</sub>) were co-flowed in at 10–30 sccm and 30–100 sccm, respectively. The temperature and reactor pressure were kept at 520 °C and 40 Torr (5.3 kPa), respectively. Next, two sets of samples were made by using a thermal evaporator to deposit one set of 0.3 nm and another set of 3 nm films on the Si nanowires. CNF growth on the Ni coated Si nanowire substrates was carried out at 760 Torr and 600 °C for 7 s. High purity H<sub>2</sub> and acetylene were flowed in at 100–150 sccm and 5–10 sccm, respectively. The morphology of the samples was investigated using a Hitachi S-4300SE and S-5500 field emission scanning electron microscope (SEM) and a Jeol JEM 2100F field emission transmission electron microscope (TEM).

### **Evaluation of electrochemical performance**

Coin-type half cells (2016R type) were fabricated to investigate the electrochemical performance of the two kinds of Si-CNF composite electrodes. Pure Li metal and 1.3 M LiPF<sub>6</sub> with ethylene carbonate/diethylene carbonate (EC/DEC, 3:7 vol.%) were used as a counter electrode and an electrolyte, respectively. The galvanostatic cycling performances of the coin-type half cells were evaluated at a C/5 rate in the voltage range between 0.01 V and 2 V using a Toyo Systems TOSCAT 3000 battery cycle tester.

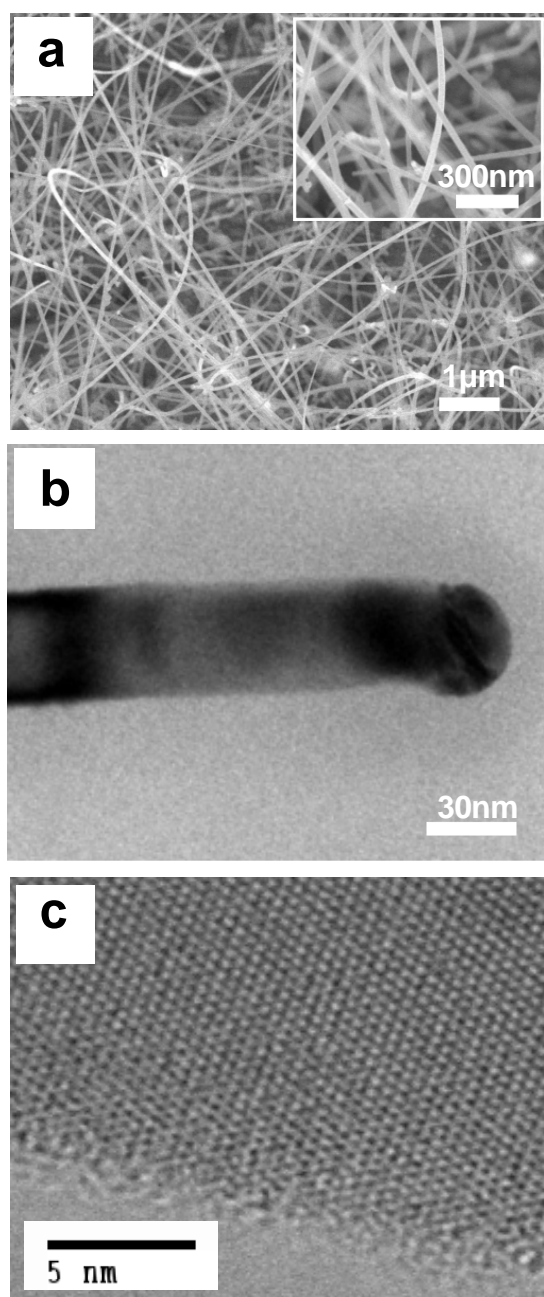

Fig. S1 (a) SEM image of as synthesized SiNWs (inset: high magnification image) (b) TEM image of a single SiNW. (c) HR-TEM image of the surface of a SiNW.

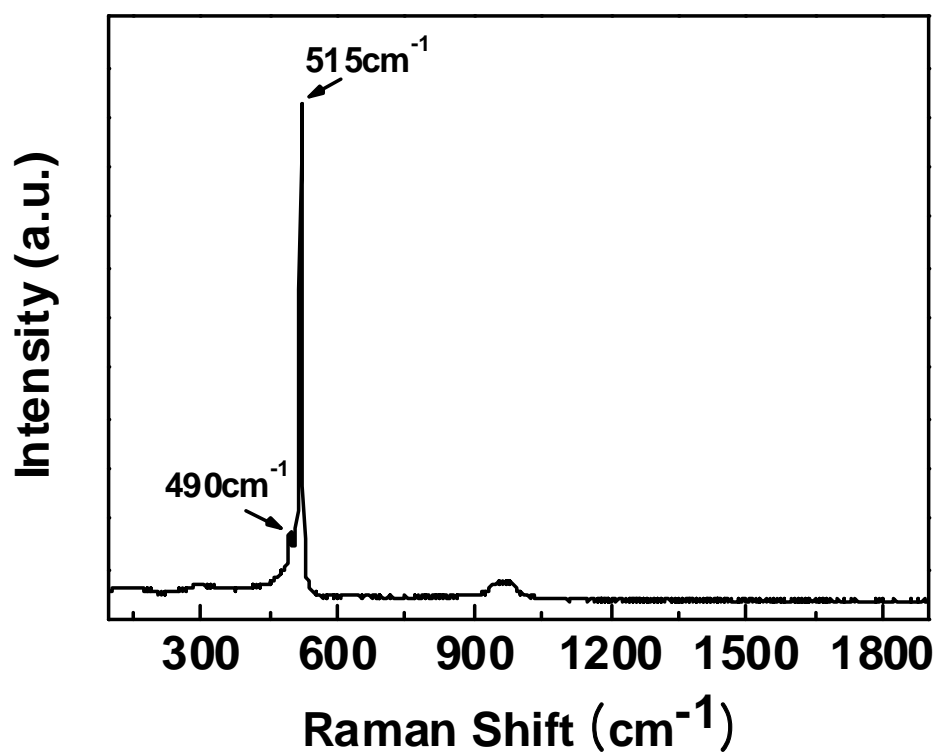

Fig. S2. Raman spectrum of SiNWs on an SUS substrate.

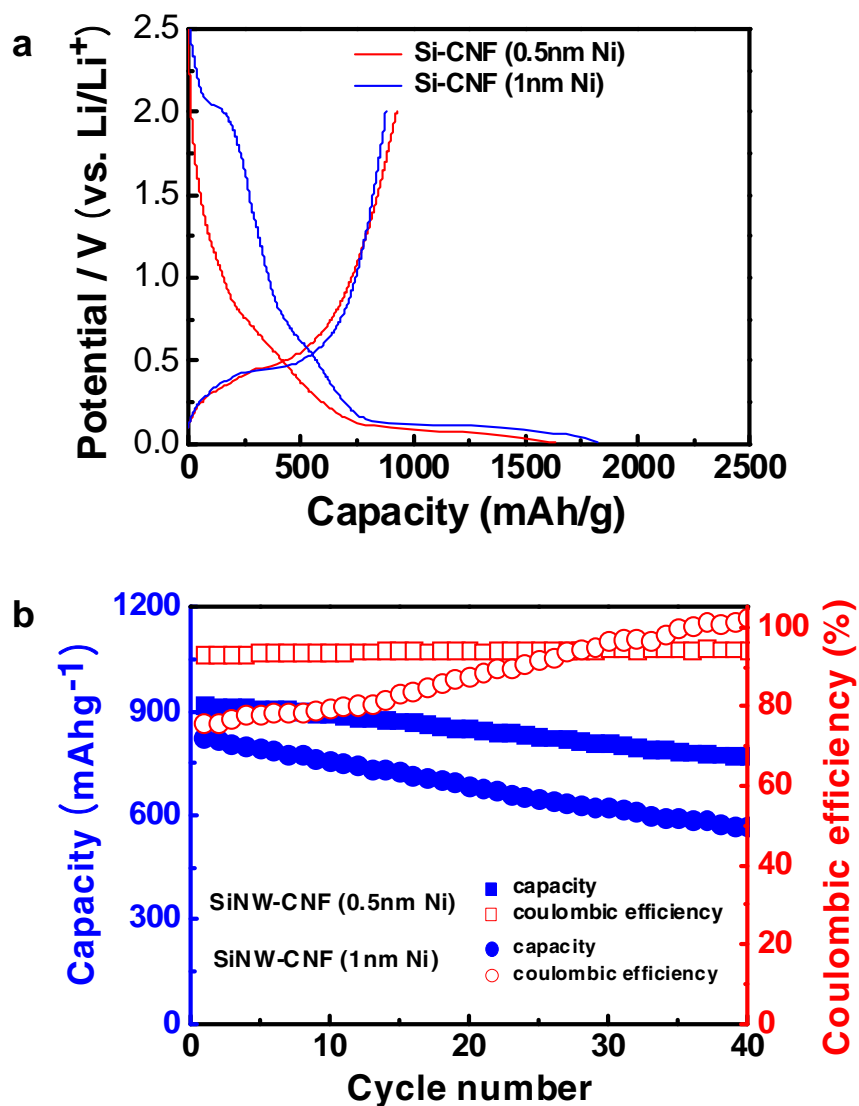

Fig. S3. (a) Voltage profiles of two types of SiNWs-CNFs composites for the first cycle at a rate of 0.2 C. (b) Cycle performances at a rate of 0.02 C. SiNWs-CNF structures grown using a Ni catalyst of 0.5 nm and 1 nm thickness are denoted as SiNWs-CNF (0.5nm Ni) and SiNW-CNF (1nm Ni), respectively.

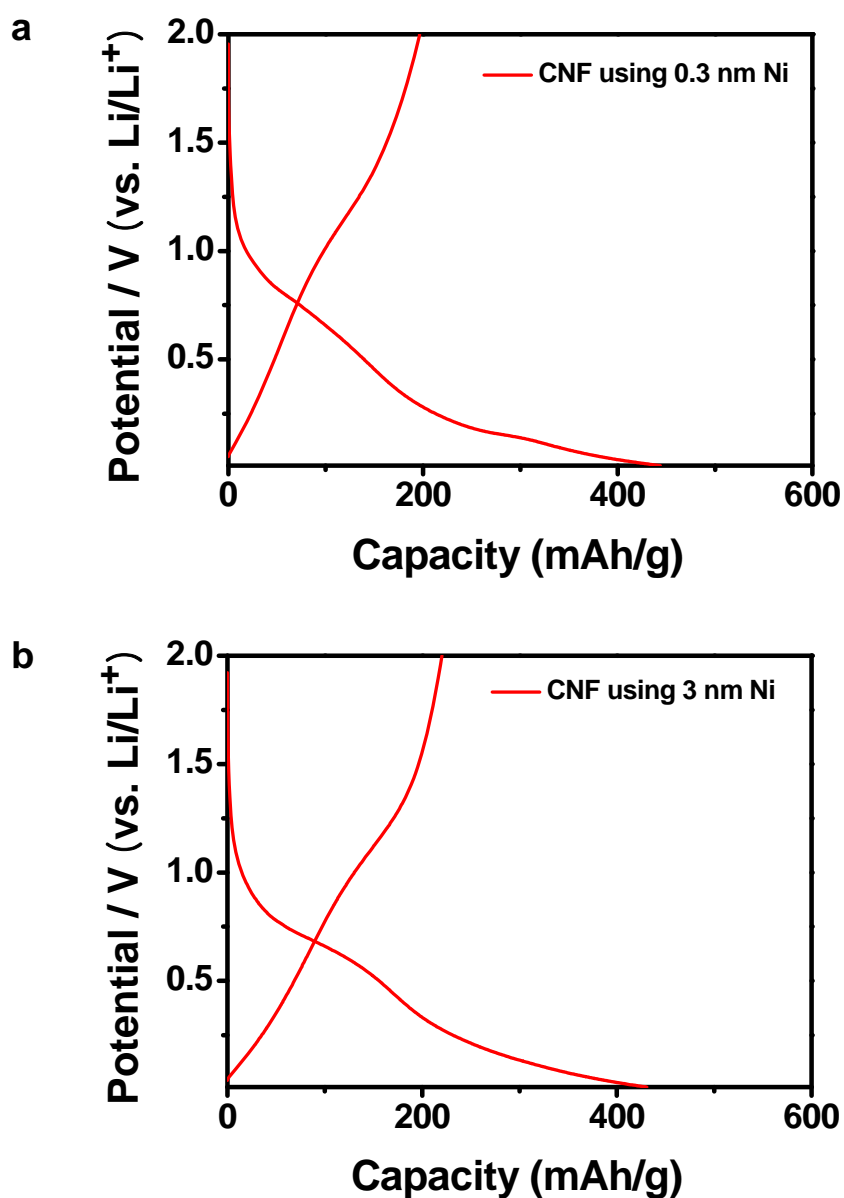

Fig. S4. (a) Voltage profiles of CNFs synthesized using a Ni catalyst with 0.3 nm thickness at the first cycle. (b) Voltage profiles of CNFs synthesized using a Ni catalyst with 3 nm thickness at the first cycle.
